# Supplementary material
Source: Royal Society of Chemistry journal article supplement (doi:10.1039/d5en01173f)
Supplement: d5en01173f1.pdf [file d5en01173f1.pdf]

## Supplementary information for: Extraction, quantification and characterization of mercury and selenium containing nanoparticles in seal livers using single particle inductively coupled plasma time of flight mass spectrometry (spICP-ToF-MS)

Houssame-Eddine Ahabchane<sup>1</sup>, Chrystelle Lessard<sup>1</sup>, Maria Chrifi-Alaoui<sup>2</sup>, Sofia Paciello<sup>2</sup>, Dominic Ponton<sup>2</sup>, Marc Amyot<sup>2</sup> and Kevin J. Wilkinson<sup>1,\*</sup>

<sup>1</sup>Biophysical Environmental Chemistry, Université de Montréal, 1375 Ave. Therese-Lavoie-Roux, Montreal, QC, H2V 0B3

<sup>2</sup>Dept. of Biological Sciences, Université de Montréal, 1375 Ave. Therese-Lavoie-Roux, Montreal, QC, H2V 0B3

\*kj.wilkinson@umontreal.ca

**Table S1:** Samples of marine mammals from Northern Quebec: Seal species information.

| <b>Sample ID</b> | <b>Age</b>          | <b>Species</b> | <b>Sex</b> | <b>Location</b>                                   |
|------------------|---------------------|----------------|------------|---------------------------------------------------|
| <b>Carole H1</b> | 3 years             | Unknown        | Unknown    | 3 km south of Puvirnituk, Hudson Bay              |
| <b>Carole H2</b> | 8-9 months          | Unknown        | Unknown    | 2 km north of Puvirnituk, Hudson Bay              |
| <b>Ringed</b>    | Young (age unknown) | Ringed seal    | Female     | Near Marralik River, Kangiqsualujjuaq, Ungava Bay |
| <b>Bearded</b>   | Unknown             | Bearded seal   | Male       | Near Marralik River, Kangiqsualujjuaq, Ungava Bay |

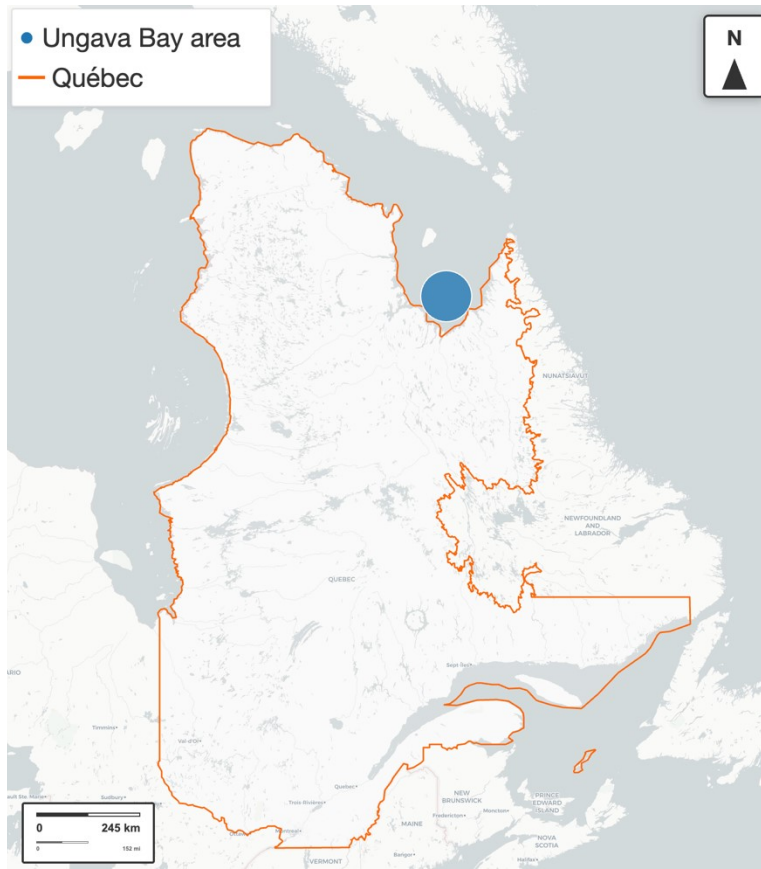

**Figure S1:** Sampling location of the Bearded seal (*Erignathus barbatus*) near Marralik River, Kangiqsualujjuaq, Ungava Bay area.

**Table S2:** Operating conditions for the ICP-ToF-MS and for the ICP-MS. ICP-ToF-MS was run from 60-210 amu.

| Technique  | Nebulizer gas flow rate (mL min <sup>-1</sup> ) | Auxiliary gas flow rate (mL min <sup>-1</sup> ) | Cooling gas flow rate (mL min <sup>-1</sup> ) | Reaction/collision gas                                                 | Sample flow rate (μL min <sup>-1</sup> ) | Dwell time (μs) | Acquisition time (s) | Transport efficiency (μL s <sup>-1</sup> ) |
|------------|-------------------------------------------------|-------------------------------------------------|-----------------------------------------------|------------------------------------------------------------------------|------------------------------------------|-----------------|----------------------|--------------------------------------------|
| ICP-ToF-MS | 1050                                            | 2000                                            | 13000                                         | He: 17 mL min <sup>-1</sup><br>H <sub>2</sub> : 5 mL min <sup>-1</sup> | 450                                      | 71.97-192       | 60                   | 0.352±0.120                                |
| ICP-MS     | 980                                             | 1200                                            | 16000                                         | O <sub>2</sub> : 600 mL min <sup>-1</sup>                              | 450                                      | 50000           | 20                   | -                                          |

**Table S3:** Recoveries of the certified reference materials (DOLT-5 for total Hg and total Se; SRM 2974a for MeHg). In addition, total mercury, total selenium and methylmercury (MeHg) concentrations were determined for selected seal livers

|                     | Hg 202 (μg g <sup>-1</sup> ) | Se 82 (μg g <sup>-1</sup> ) | MeHg (μg g <sup>-1</sup> ) |
|---------------------|------------------------------|-----------------------------|----------------------------|
| <b>Recovery (%)</b> | 96.4                         | 88.9                        | 105                        |
| <b>Carole H1</b>    | 12.7±0.4                     | 17.2±0.3                    | 0.799                      |
| <b>Carole H2</b>    | 1.8±0.1                      | 7.2±0.0                     | 0.439                      |
| <b>Ringed seal</b>  | 4.8±0.2                      | 6.6±0.2                     | 1.217                      |
| <b>Bearded seal</b> | 425.9±5.1                    | 172.6±2.5                   | 2.015                      |

**Text S1:** Methylmercury (MeHg) analyses

Methylmercury (MeHg) analyses were conducted in the laboratory of Marc Amyot, Université de Montréal, Québec, Canada. Tissue samples were freeze-dried and homogenized before analysis following trace metal clean protocols. Liver tissue was analyzed by Cold Vapor Atomic Fluorescence Spectrometry (CV-AFS) with a Tekran 2700 using Environmental Protection Agency (EPA) method 1630<sup>1</sup> (Tekran Instruments Corporation, Seattle, WA, USA). To ensure analytical accuracy, the standard reference material SRM 2974a (mussel tissue, National Institute of Standards and Technology, USA) was analyzed alongside the samples. The measured recoveries of MeHg are reported in Table S3.

**Table S4:** Tested enzymatic and chemical digestion protocols.

| <b>Sample Mass</b> | <b>Solution Composition</b>                                                                                                                      | <b>Conditions</b>                                                              | <b>Post-treatment</b>                              | <b>References</b> |
|--------------------|--------------------------------------------------------------------------------------------------------------------------------------------------|--------------------------------------------------------------------------------|----------------------------------------------------|-------------------|
| 20-100 mg          | 8 mL of 5 mM HEPES (pH 7.5), pancreatin and 1.5 mg mL <sup>-1</sup> lipase ( $\geq 1,050$ units mL <sup>-1</sup> )                               | 15 min ultrasonication (21% amplitude), Pulse mode (50s on/10 s off), ice bath | Centrifuge 1000×g, 5 min                           | 2                 |
| 20-50 mg           | 3 mL of 50 mM ammonium bicarbonate (pH 7.4), 2 mg/mL proteinase K ( $\geq 60$ units mL <sup>-1</sup> ) + 2 mL buffer (HEPES) with 4% SDS         | 2 min ultrasonication + 1 h sonication bath                                    | Defatting with methanol, centrifuge 4400×g, 20 min | 3                 |
| 20-50 mg           | 5 mL of 50 mM ammonium bicarbonate (pH 7.4) + 5 mg mL <sup>-1</sup> SDS, 1 mg mL <sup>-1</sup> proteinase K ( $\geq 60$ units mL <sup>-1</sup> ) | 37°C overnight (12-16 h)                                                       | Centrifuge 4000×g, 6 min                           | 4, 5              |
| 20-50 mg           | 5 mL of 10% (v/v) TMAH + 0.01% Triton X-100                                                                                                      | 15 min ultrasonication                                                         | Centrifuge 1000×g, 5 min                           | 2                 |
| 250 mg             | 5 mL of 25% v/v TMAH + 20 mL Milli-Q water                                                                                                       | Room temp 1h                                                                   | Centrifuge 500×g, 3 min                            | 6                 |
| 20-50 mg           | 5 mL of 50% (v/v) formic acid+ 0.01% (v/v) Triton X-100                                                                                          | 15 min ultrasonication                                                         | Centrifuge 1000×g, 5 min                           | 3                 |
| 75 mg              | 2 mL of 25% w/w TMAH + 8 mL (0.5% HNO <sub>3</sub> + 0.01% Triton X-100)                                                                         | Room temp 12 h with constant mixing                                            | Store at -20°C                                     | 7                 |
| 20 mg              | 5 mL of Milli-Q water                                                                                                                            | 15 minutes at 25% amplitude (pulse mode: 50s on, 10s off, ice bath)            | Centrifuge 1000×g, 5 min                           | -                 |
| 300 mg             | 300 mg Tris-HCl 10mM buffer + 2% SDS (3 mL)37°C for 1 hour<br>Centrifuge 3500×g, 15 min                                                          | 37°C for 1 hour                                                                | Centrifuge 3500×g, 15 min                          | 8, 9              |
| 100 mg             | 0.1 M NaCl + 1 M 2-mercaptoethanol (10 mL)                                                                                                       | Room temperature (~21°C) for 1 hour                                            | Store at 4°C                                       | 8                 |

**Table S5:** The number of mercury-containing particles that were obtained for each extraction method. Particle numbers ( $\text{mL}^{-1}$ ) were determined using a transport rate of  $0.3874 \mu\text{L s}^{-1}$ , with a total acquisition time of 180 s and a 100-fold dilution factor applied the samples.

| Method                         | Hg particle | HgSe particle | Particle $\text{mL}^{-1}$   | Se SDL (nm) | Hg SDL (nm) |
|--------------------------------|-------------|---------------|-----------------------------|-------------|-------------|
| <b>HCOOH</b>                   | 2107        | 1707          | $(5.5 \pm 0.1) \times 10^6$ | 110.2       | 79.1        |
| <b>TMAH</b>                    | 246         | 77            | $(4.6 \pm 0.8) \times 10^5$ | 112.2       | 82.6        |
| <b>Proteinase &amp; Lipase</b> | 50          | 99            | $(2.2 \pm 0.1) \times 10^5$ | 100.0       | 67.3        |
| <b>Lipase</b>                  | 280         | 178           | $(6.5 \pm 0.2) \times 10^5$ | 100.5       | 69.8        |
| <b>Pure water</b>              | 254         | 112           | $(5.3 \pm 0.1) \times 10^5$ | 96.6        | 67.3        |

**Text S2:**

To validate the stoichiometric composition of the bulk HgSe nanoparticle powder used as a reference material, a total acid digestion was performed using a CEM Mars 5 microwave digestion system following EPA Method 3051. Approximately 80-90 mg of HgSe powder was accurately weighed and transferred into Teflon digestion vessels. A mixture of concentrated acids (3 mL  $\text{HNO}_3$  + 1 mL HCl) was added to each vessel to ensure complete digestion of the material. Following digestion, the clear solutions were quantitatively transferred to 50 mL volumetric flasks and diluted with ultrapure water ( $18.2 \text{ M}\Omega \cdot \text{cm}$ ). Further dilutions were prepared as needed for instrumental analysis in order to bring the concentrations within optimal analytical ranges for each instrument. A dual-instrument validation confirmed the 1:1 stoichiometric composition of the HgSe reference material:

| Instrument              | Se:Hg molar ratio |
|-------------------------|-------------------|
| ICP-ToF-MS (Nu Vitesse) | 1.096             |
| ICP-MS (NeXION 5000)    | 0.990             |

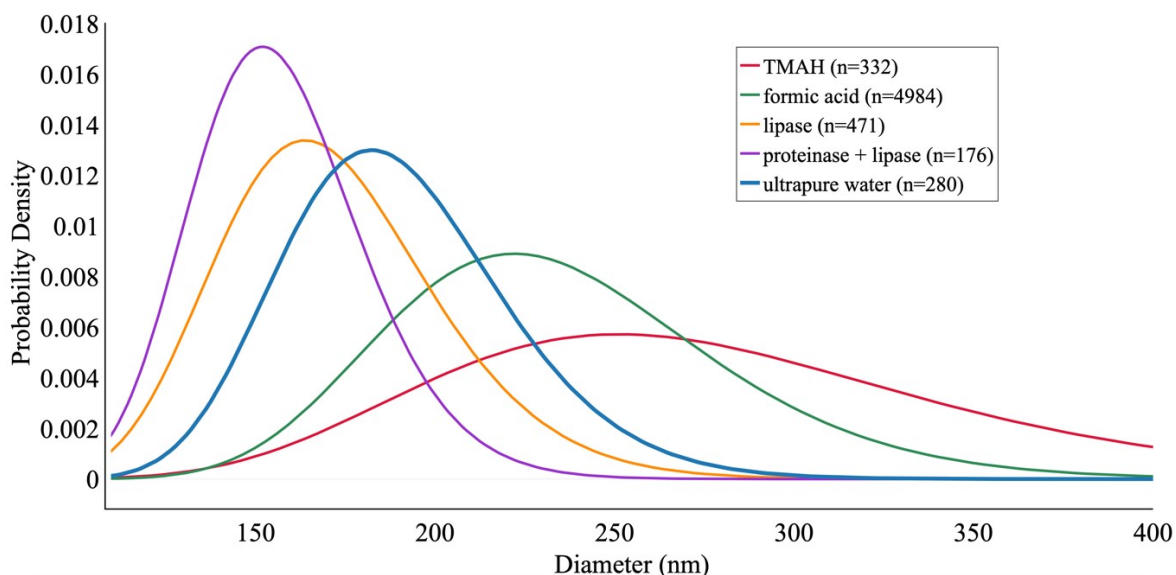

**Figure S2:** Size distribution of HgSe nanoparticles extracted from a Bearded Seal liver using five different extraction methods fitted to log-normal (TMAH (tetramethylammonium hydroxide): red, formic acid (HCOOH): green, lipase: orange, and proteinase + lipase: violet and ultrapure water: brown) (3 biological replicates, 3 analytical replicates per method). Under the assumption that the NP were spherical, particle size distributions were obtained by determining the diameter of a sphere ( $d$ ) estimated from an assumed particle density ( $\rho$ ) of  $8.27 \text{ g cm}^{-3}$  for HgSe with the particle mass determined from the sum of the detector counts. Numbers in parentheses represent the total particle numbers analyzed containing HgSe from all replicates.

**Table S6:** Sensitivity, limit of detection (LOD), limit of quantification (LOQ) for the ionic solution. Mass detection limits (MDL), mass quantification limits (MQL), size detection limits (SDL), and size quantification limits (SQL) of isotopes analyzed by spICP-ToF-MS from formic acid extraction.

| Isotope           | Sensitivity<br>[cps/ $\mu\text{g L}^{-1}$ ] | $R^2$  | LOD<br>[ $\mu\text{g L}^{-1}$ ] | LOQ<br>[ $\mu\text{g L}^{-1}$ ] | MDL<br>[fg] | MQL<br>[fg] | SDL<br>[nm] | SQL<br>[nm] |
|-------------------|---------------------------------------------|--------|---------------------------------|---------------------------------|-------------|-------------|-------------|-------------|
| $^{80}\text{Se}$  | 2530                                        | 0.9949 | 0.6                             | 2.2                             | 0.3         | 1.0         | 70.7        | 105.6       |
| $^{107}\text{Ag}$ | 36428                                       | 0.9992 | 0.2                             | 3.7                             | 0.1         | 0.2         | 15.4        | 23          |
| $^{202}\text{Hg}$ | 3230                                        | 0.9955 | 0.7                             | 11.1                            | 0.5         | 1.7         | 54.8        | 81.9        |
| $^{209}\text{Bi}$ | 61100                                       | 1      | 0.12                            | 8.09                            | 0.1         | 0.2         | 20.7        | 31          |

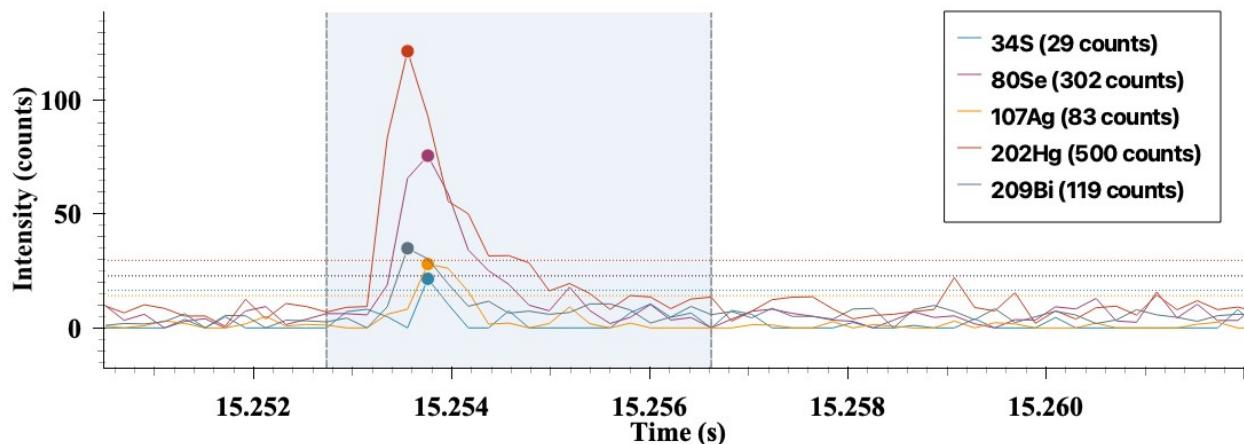

**Figure S3:** Transient mass spectrometry signal for sulfur (blue), selenium (purple), silver (orange), mercury (red), and bismuth (grey) containing nanoparticles by spICP-TOF-MS following an extraction using formic acid. Note  $^{34}\text{S}$ , with a natural abundance of only 4.25%, was used for the detection of sulfur.

#### References:

- (1) Agency, U. E. P. Method 1630: methyl mercury in water by distillation, aqueous ethylation, purge and trap, and cold vapor atomic fluorescence spectrometry. US Environmental Protection Agency Washington, DC: 1998.
- (2) Chalifoux, A.; Hadioui, M.; Amiri, N.; Wilkinson, K. J. Analysis of Silver nanoparticles in ground beef by single particle inductively coupled plasma mass spectrometry (SP-ICP-MS). *Molecules* 2023, 28 (11), 4442-4455.
- (3) El Hanafi, K.; Gomez-Gomez, B.; Pedrero, Z.; Bustamante, P.; Cherel, Y.; Amouroux, D.; Madrid, Y. Simple and rapid formic acid sample treatment for the isolation of HgSe nanoparticles from animal tissues. *Analytica Chimica Acta* 2023, 1250, 340952. DOI: <https://doi.org/10.1016/j.aca.2023.340952>.
- (4) Gajdosechova, Z.; Lawan, M. M.; Urgast, D. S.; Raab, A.; Scheckel, K. G.; Lombi, E.; Kopittke, P. M.; Loeschner, K.; Larsen, E. H.; Woods, G.; et al. In vivo formation of natural HgSe nanoparticles in the liver and brain of pilot whales. *Scientific Reports* 2016, 6 (1), 34361. DOI: 10.1038/srep34361.
- (5) Loeschner, K.; Navratilova, J.; Købler, C.; Mølhav, K.; Wagner, S.; von der Kammer, F.; Larsen, E. H. Detection and characterization of silver nanoparticles in chicken meat by asymmetric flow field flow fractionation with detection by conventional or single particle ICP-MS. *Anal Bioanal Chem* 2013, 405 (25), 8185-8195. DOI: 10.1007/s00216-013-7228-z From NLM.
- (6) Tao, G.; Willie, S. N.; Sturgeon, R. E. Determination of total mercury in biological tissues by flow injection cold vapour generation atomic absorption spectrometry following tetramethylammonium hydroxide digestion. *Analyst* 1998, 123 (6), 1215-1218. DOI: 10.1039/a802000k From NLM.
- (7) Batista, B. L.; Grotto, D.; Rodrigues, J. L.; Souza, V. C.; Barbosa, F., Jr. Determination of trace elements in biological samples by inductively coupled plasma mass spectrometry with

tetramethylammonium hydroxide solubilization at room temperature. *Anal Chim Acta* 2009, 646 (1-2), 23-29. DOI: 10.1016/j.aca.2009.05.022 From NLM.

(8) Ikemoto, T.; Kunito, T.; Tanaka, H.; Baba, N.; Miyazaki, N.; Tanabe, S. Detoxification mechanism of heavy metals in marine mammals and seabirds: interaction of selenium with mercury, silver, copper, zinc, and cadmium in liver. *Arch Environ Contam Toxicol* 2004, 47 (3), 402-413. DOI: 10.1007/s00244-004-3188-9 From NLM.

(9) Naganuma, A.; Imura, N. Properties of mercury and selenium in a high-molecular weight substance in rabbit tissues formed by simultaneous administration. *Pharmacol Biochem Behav* 1981, 15 (3), 449-454. DOI: 10.1016/0091-3057(81)90276-8 From NLM.
